# Supplementary material
Source: PubMed Central journal article supplement (PMC3260832)

Supplement Figure 1

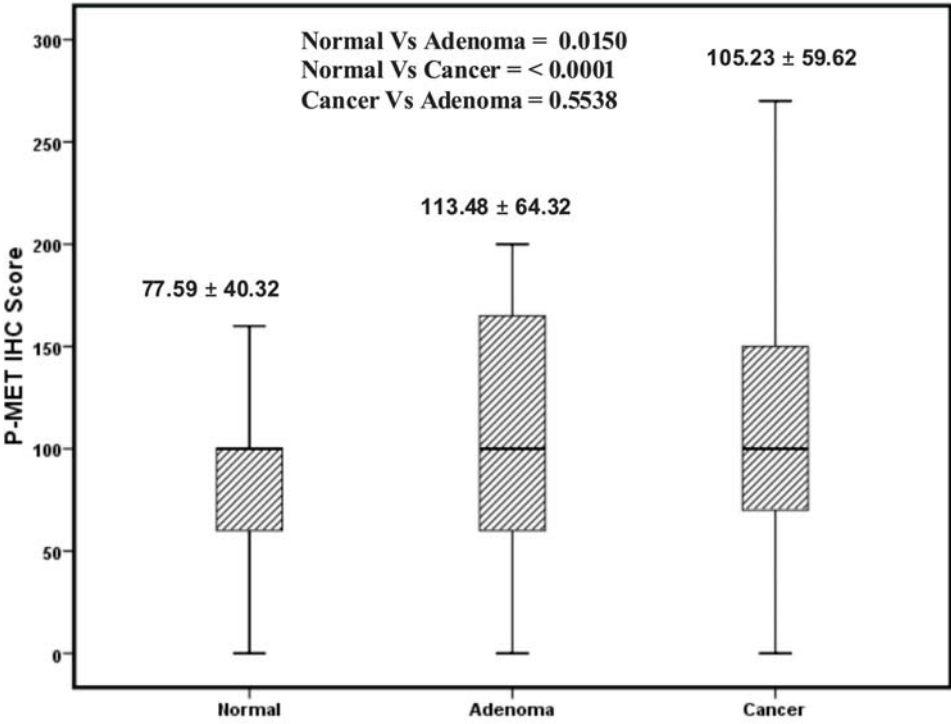

Supplement: mmc1.pdf [file mmc1.pdf]

**Supplement Figure 2**

**Colo-320    HCT-15    LOVO    SW-480**

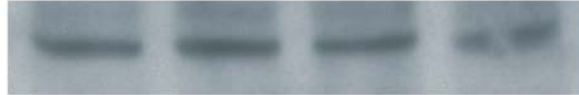

**Blot: Anti-p-Met**

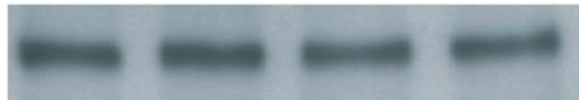

**Blot: Anti-Beta-actin**

Supplement: mmc2.pdf [file mmc2.pdf]

Supplement Figure 3

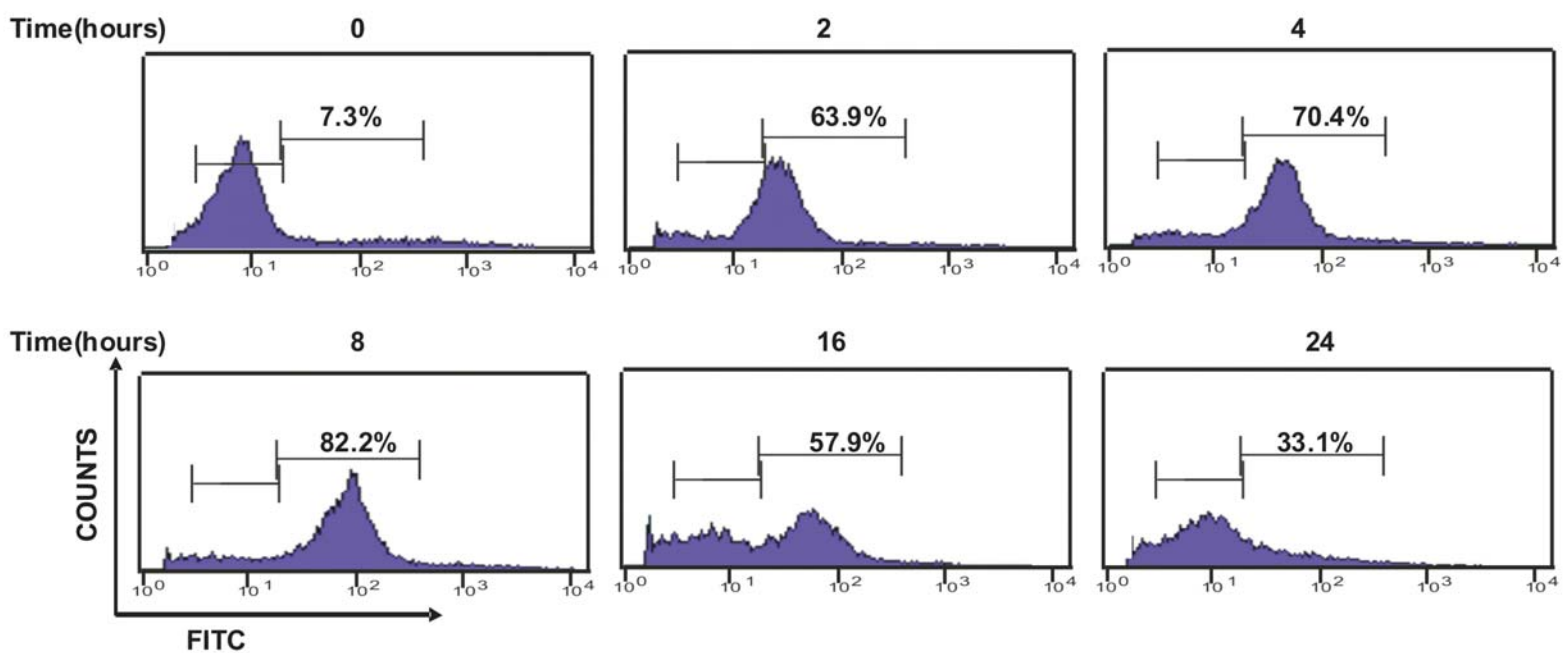

Supplement: mmc3.pdf [file mmc3.pdf]

A

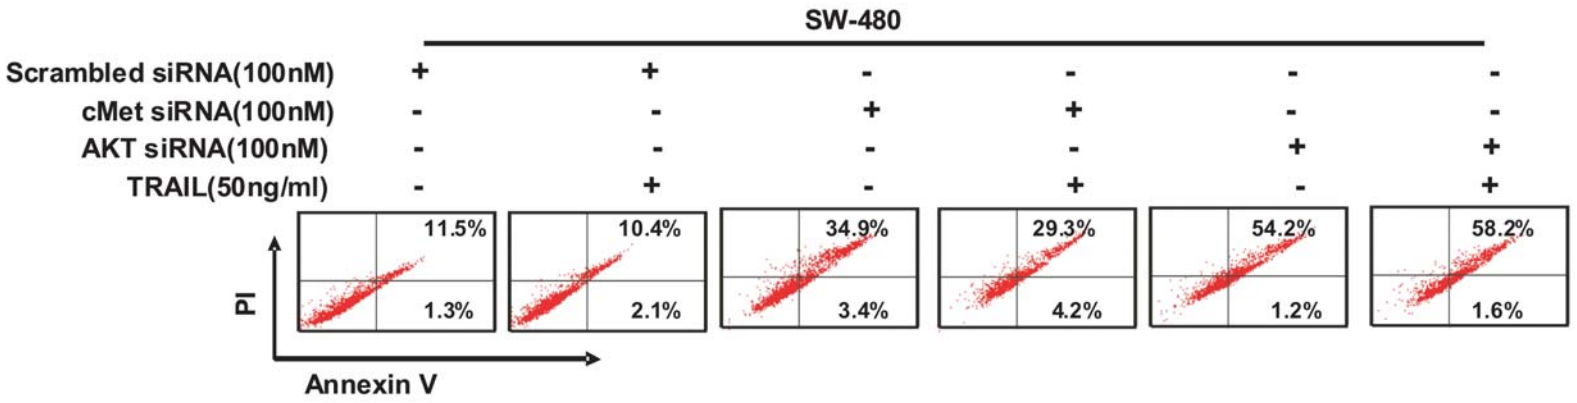

B

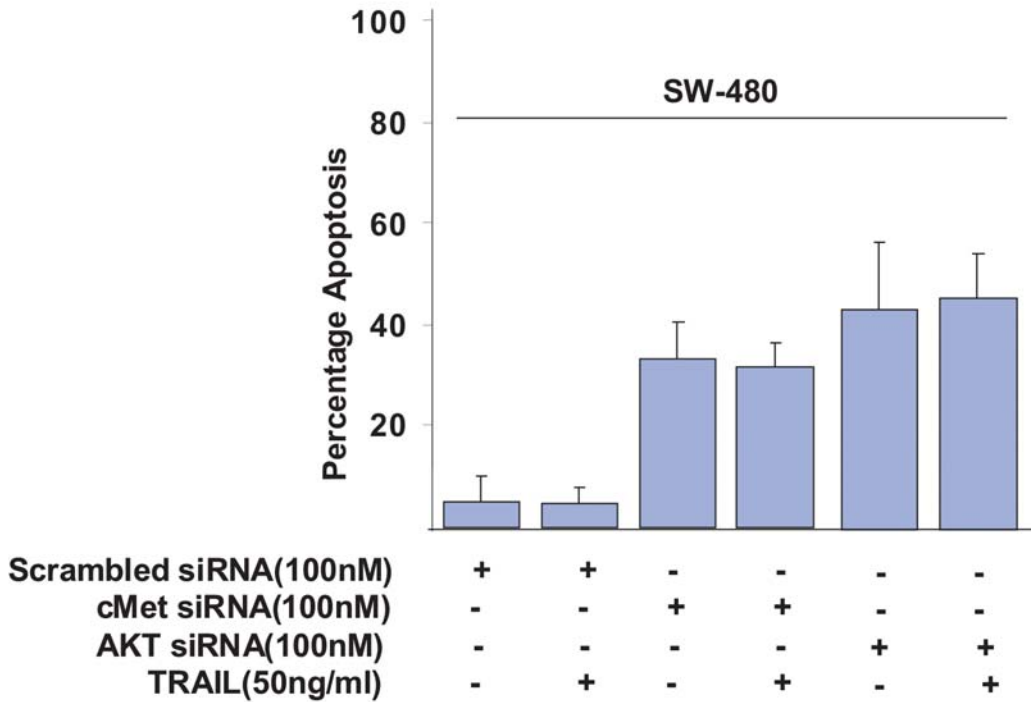

Supplement: mmc4.pdf [file mmc4.pdf]
